# Supplementary material for: Catch of the Day: New Serum Amyloid A (SAA) Antibody Is a Valuable Tool to Study Fish Health in Salmonids
Source: MDPI journal article supplement (doi:10.3390/cells12162097), 2023-08-19
Supplement: s1 [file s1]

Query: LOCUS: BT057477 652 bp mRNA  
Program: BLASTX  
Database: nr All non-redundant GenBank CDS translations+PDB+SwissProt+PIR+PRF excluding environmental samples from WGS projects

Query range 1: 1 to 128

|                |    |                            |                                                                                                        |     |                                                         |
|----------------|----|----------------------------|--------------------------------------------------------------------------------------------------------|-----|---------------------------------------------------------|
| Query          | 60 | KFVASASMKlllaglvtltlvgaqag | WYRFPGEAARGAKDMWRAYGDMKDANWKNSDKYFHARGNYDaarrgpggrwaaaVISNGREMVQGSSSGRGHEDSAADQEANRWGRNGGDPNRYRPNGLPRN | 443 |                                                         |
| NP_001140037.1 | 20 |                            |                                                                                                        | 121 | serum amyloid A-5 protein precursor [Salmo salar]       |
| XP_029577060.1 | 20 |                            |                                                                                                        | 121 | serum amyloid A-5 protein-like [Salmo trutta]           |
| XP_029577059.1 | 20 |                            |                                                                                                        | 121 | serum amyloid A-5 protein-like [Salmo trutta]           |
| XP_029623550.1 | 20 |                            |                                                                                                        | 121 | serum amyloid A-5 protein-like [Salmo trutta]           |
| NP_001117908.1 | 13 |                            |                                                                                                        | 114 | acute phase serum amyloid A (SAA) [Oncorhynchus mykiss] |
| NP_001117908.1 | 20 |                            |                                                                                                        | 121 | serum amyloid A protein precursor [Oncorhynchus mykiss] |
| CDR00160.1     | 15 | R.                         |                                                                                                        | 142 | unnamed protein product [Oncorhynchus mykiss]           |
| XP_021442123.1 | 20 |                            |                                                                                                        | 121 | serum amyloid A-5 protein [Oncorhynchus mykiss]         |
| XP_035643137.1 | 20 |                            |                                                                                                        | 121 | serum amyloid A-5 protein-like [Oncorhynchus keta]      |
| XP_035595418.1 | 20 |                            |                                                                                                        | 121 | serum amyloid A-5 protein-like [Oncorhynchus keta]      |
| XP_020335201.1 | 20 |                            |                                                                                                        | 121 | serum amyloid A-5 protein-like [Oncorhynchus kisutch]   |
| XP_020335202.1 | 20 |                            |                                                                                                        | 121 | serum amyloid A-5 protein-like [Oncorhynchus kisutch]   |
| XP_020334223.1 | 20 |                            |                                                                                                        | 121 | serum amyloid A-5 protein [Oncorhynchus kisutch]        |
| XP_046201745.1 | 20 |                            |                                                                                                        | 121 | serum amyloid A-5 protein-like [Oncorhynchus gorbuscha] |
| XP_046205133.1 | 20 |                            |                                                                                                        | 121 | serum amyloid A-5 protein-like [Oncorhynchus gorbuscha] |
| XP_024274892.1 | 20 |                            |                                                                                                        | 121 | serum amyloid A-5 protein [Oncorhynchus tshawytscha]    |
| XP_029495343.1 | 20 |                            |                                                                                                        | 121 | serum amyloid A-5 protein-like [Oncorhynchus nerka]     |
| XP_029495683.1 | 20 |                            |                                                                                                        | 121 | serum amyloid A-5 protein-like [Oncorhynchus nerka]     |
| XP_041697366.1 | 20 |                            |                                                                                                        | 121 | serum amyloid A-5 protein [Coregonus clupeaformis]      |
| XP_041715780.1 | 20 |                            |                                                                                                        | 121 | serum amyloid A-5 protein [Coregonus clupeaformis]      |
| CEG62717.1     | 20 |                            |                                                                                                        | 121 | serum amyloid A [Coregonus maraena]                     |
| CAB1339290.1   | 2  | .T..G..V.                  |                                                                                                        | 127 | unnamed protein product [Coregonus sp. 'balchen']       |
| XP_041726121.1 | 20 |                            |                                                                                                        | 121 | serum amyloid A [Coregonus clupeaformis]                |
| XP_038851242.1 | 20 |                            |                                                                                                        | 121 | serum amyloid A-5 protein-like [Salvelinus namaycush]   |
| XP_038851234.1 | 20 |                            |                                                                                                        | 121 | serum amyloid A-5 protein-like [Salvelinus namaycush]   |
| XP_038838543.1 | 20 |                            |                                                                                                        | 121 | serum amyloid A-5 protein-like [Salvelinus namaycush]   |
| XP_023851415.1 | 20 |                            |                                                                                                        | 121 | serum amyloid A-5 protein-like [Salvelinus alpinus]     |
| XP_023995671.1 | 20 |                            |                                                                                                        | 121 | serum amyloid A-5 protein-like [Salvelinus alpinus]     |

MKlllaglvtltlvgaqag - signal peptide  
RYRPNGLPRNY - immunogen peptide

Figure S1: SAA5 amino acid sequence alignment in salmonids.
